# Supplementary material for: Functional Contributions of Positive Charges in the Pore-Lining Helix 3 of the Bordetella pertussis CyaA-Hemolysin to Hemolytic Activity and Ion-Channel Opening
Source: PubMed Central journal article supplement (PMC5371864; doi:10.3390/toxins9030109), 2017-03-16
Supplement: toxins-09-00109-s001.pdf [file toxins-09-00109-s001.pdf]

# Supplementary Materials: Functional Contributions of Positive Charges in the Pore-Lining Helix 3 of the *Bordetella pertussis* CyaA-Hemolysin to Hemolytic Activity and Ion-Channel Opening

Chattip Kurehong, Chalernpol Kanchanawarin, Busaba Powthongchin, Panchika Prangkio, Gerd Katzenmeier and Chanan Angsuthanasombat

Table S1. Complementary primers used in mutagenesis.

| Primer <sup>a</sup> | Sequences <sup>b</sup>                                                              | Restriction site <sup>c</sup> |
|---------------------|-------------------------------------------------------------------------------------|-------------------------------|
| Q574K-f<br>Q574K-r  | 5'-GCG <b>CTGAA</b> ATTGACAGGTGGAACG-3'<br>3'-GGCTCTAGCGCG <b>ACTTT</b> AACTGTCC-5' | <i>Pst</i> I                  |
| Q574R-f<br>Q574R-r  | 5'-GCG <b>CTGCGCT</b> TGACAGGTGGAACG-3'<br>3'-GGCTCTAGCGCG <b>ACGCGA</b> ACTGTCC-5' | <i>Pst</i> I                  |
| Q574E-f<br>Q574E-r  | 5'-GCG <b>CTGGA</b> ATTGACAGGTGGAACG-3'<br>3'-GGCTCTAGCGCG <b>ACCTT</b> AACTGTCC-5' | <i>Pst</i> I                  |
| E581K-f<br>E581K-r  | 5'-ACGGTCA <b>AACT</b> GGCTTCTTCCATCG-3'<br>3'-TGTCCACCTTGCCAG <b>TTG</b> ACCGA-5'  | <i>Alu</i> I                  |
| E581R-f<br>E581R-r  | 5'-ACGGTCC <b>GCT</b> GGCTTCTTCCATCG-3'<br>3'-TGTCCACCTTGCCAG <b>GCGG</b> ACCGA-5'  | <i>Alu</i> I                  |
| E581Q-f<br>E581Q-r  | 5'-ACGGTCC <b>AACT</b> GGCTTCTTCCATCG-3'<br>3'-TGTCCACCTTGCCAG <b>TTG</b> ACCGA-5'  | <i>Alu</i> I                  |

<sup>a</sup> f and r represent forward and reverse primers, respectively. <sup>b</sup> Underlined bases represent the recognition sites introduced for restriction enzyme analysis. Bold letters indicate the substituted nucleotide residues. The mutated residues in introduced restriction sites generate silent mutations. <sup>c</sup> Deleted recognition sites.

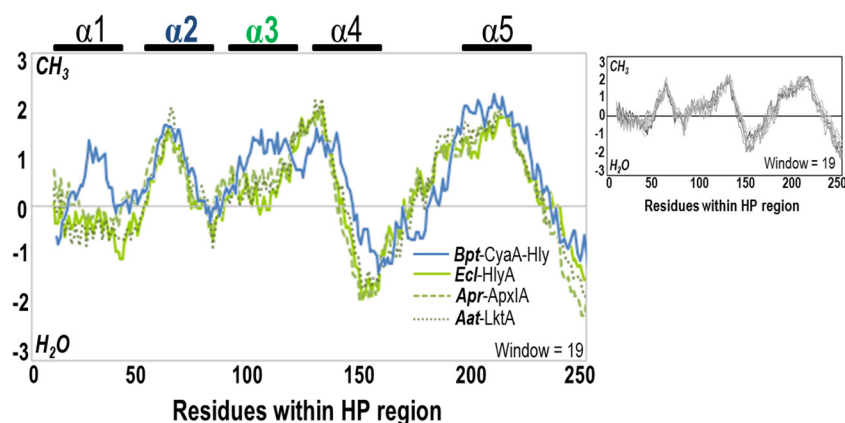

**Figure S1.** Hydropathy profile of the hydrophobic (HP) region from CyaA-Hly (blue line) compared with three highly-active RTX cytolysins i.e. HlyA, ApxIA and LtxA (green lines). The hydrophobicity scale was plotted versus amino acid sequences (~250 residues) covering the hydrophobic regions with a window size of 19 using Kyte-Doolittle hydropathy index. Five putative helices in the HP region of CyaA-Hly were indicated. Inset: the hydropathy profile of the HP region from all twelve related RTX cytolysins as mentioned earlier in [25].

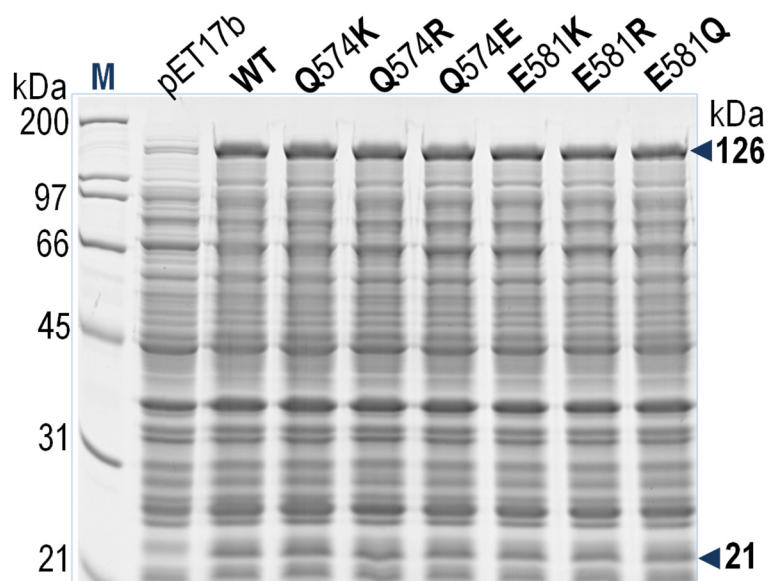

**Figure S2.** SDS-PAGE (12% gel) of the soluble lysates extracted from *E. coli* harboring different plasmids; pET-17b vector, pCyaAC-PF/H<sub>6</sub> (Wt) and pCyaAC-PF/H<sub>6</sub> with mutations (Q574K, Q574R, Q574E, E581K, E581R and E581Q). Co-expressed with 126 kDa CyaA-Hly is the 21 kDa CyaC acetyltransferase marked by arrow. M is protein standard marker.
